# Supplementary material
Source: publisher site journal article supplement (https://www.dovepress.com/article/327180)
Supplement: Supplementary file 1 [file get_supplementary_file.php]

# SUPPORTING INFORMATION

**A prospective observational study of antihemophilic factor (recombinant) prophylaxis related to physical activity levels in patients with hemophilia A in the United States (SPACE)**

Barbara A. Konkle,1 Doris V. Quon,2 Leslie Raffini,3 Michael Recht,4 Vlad C. Radulescu,5 Shannon L. Carpenter,6 Amy L. Dunn,7 Mei Lu,8 Maureen Watt9

## TABLE S1 Variables and subgroups included in the statistical analysis

| **Variables** | **Subgroups and definitions** |
| --- | --- |
| **Demographics** | |
| Age | - Adolescents: 11-17 y† - Adults: 18-58 y† - For bleed rates: 5-y groups for ages 11-58 y |
| BMI | Adults ≥18 y:   - Underweight (BMI ≤18.4); normal weight (BMI 18.5-24.9); overweight (BMI 25.0-29.9); obese (BMI ≥30)   Children and adolescents <18 y:   - Underweight (<5th percentile; BMI 15.1); normal weight (5th to <85th percentile; BMI 15.2-29.7) overweight (85th to 95th percentile; BMI 29.8-40.1); obese (≥95th percentile; BMI >40.1) |
| **Bleeding episodes** | |
| Cause | Any activity related; spontaneous; other |
| Location | Joint; non-joint |
| **Haemophilia treatment**‡ | |
| Treatment regimen | Prophylaxis; on demand |
| Prophylaxis frequency | Every second day; every third day; two times/wk; three times/wk, other |
| **Activity variables**‡ | |
| Activity tracker activity levels | Very active; fairly active; lightly active; sedentary |
| eDiary: d/wk of activity | Strenuous; moderate; mild |
| NHF activity levels (NHF Sports  Rating by Activity)[[13](#_ENREF_2_13)] (for  eDiary activity levels)‡ | Level 1: low (eg, work, golf, swimming, walking, household activities)  Level 1.5: low to moderate risk (eg, body sculpting, circuit training)  Level 2: moderate risk (eg, running, jogging, cooking)  Level 2.5: moderate to high risk (eg, basketball [levels 1.5-2.5], mountain biking, downhill skiing)  Level 3: high (eg, boxing, lacrosse, rugby, wrestling) |

Abbreviations: BMI, body mass index; d, day; NHF, National Hemophilia Foundation; y, years; wk, week.

†Represents actual age groups used in the analyses based on age range in study sample. One patient aged <13 years was approved to participate, although the inclusion criteria specified a lower age limit of 13 years.

‡For activities that were not included in the NHF activity list, patients were asked to estimate the risk level for the specific activity.

‡ For the logistics regression analysis of the association between activity and time since last rAHF infusion to activity start, time-varying covariates included activity level and/or duration of activity in the current cycle, time since last rAHF infusion to beginning of the activity, and the last rAHF dose; baseline age was a fixed covariate.

## TABLE S2 Patient compliance with data entry

|  |  | Age group | | | Treatment regimen | | |
| --- | --- | --- | --- | --- | --- | --- | --- |
| **Data entry compliance†** | **Total**  **(N = 54)** | **<18 y**  **(n = 25)** | **≥18 y**  **(n = 29)** | ***P* value‡** | **On demand**  **(n = 7)** | **Prophylaxis**  **(n = 47)** | ***P* value‡** |
| eDiary |  | | | | | | |
| n | 54 | 25 | 29 | .89 | 7 | 47 | .8667 |
| Median (range) | 0.52  (0.03-0.89) | 0.56  (0.03-0.88) | 0.50  (0.10-0.89) |  | 0.78  (0.07-0.86) | 0.51  (0.03-0.89) |  |
| Patients by compliance rate, n (%)  0-20%  20-40%  40-60%  60-80%  80-100% | 7 (13.0)  9 (16.7)  20 (37.0)  12 (22.2)  6 (11.1) | 3 (12.0)  4 (16.0)  10 (40.0)  5 (20.0)  3 (12.0) | 4 (13.8)  5 (17.2)  10 (34.5)  7 (24.1)  3 (10.3) | .9919 | 3 (42.9)  0 (0)  0 (0)  1 (14.3)  3 (42.9) | 4 (8.5)  9 (19.1)  20 (42.6)  11 (23.4)  3 (6.4) | .0009 |
| Activity tracker |  | | | | | | |
| n | 53 | 24 | 29 | .2516 | 7 | 46 | .8331 |
| Median (range) | 0.94  (0.36-1.00) | 0.91  (0.56-1.00) | 0.96  (0.36-1.00) |  | 0.94  (0.60-1.00) | 0.94  (0.36-1.00) |  |
| Patients by compliance rate, n (%)  0-20%  20-40%  40-60%  60-80%  80-100% | 0 (0)  1 (1.9)  2 (3.8)  7 (13.2)  43 (81.1) | 0 (0)  0 (0)  2 (8.3)  3 (12.5)  19 (79.2) | 0 (0)  1 (3.4)  0 (0)  4 (13.8)  24 (82.8) | .4732  .4732 | 0 (0)  0 (0)  0 (0)  1 (14.3)  6 (85.7) | 0 (0)  1 (2.2)  2 (4.3)  6 (13.0)  37 (80.4) | 1.000  1.000 |
| eDiary and activity tracker |  | | | | | | |
| n | 53 | 24 | 29 | .7848 | 7 | 46 | .6124 |
| Median (range) | 0.4  (0-0.86) | 0.37  (0-0.78) | 0.47  (0.03-0.86) |  | 0.63  (0.03-0.86) | 0.39  (0-0.86) |  |
| Patients by compliance rate, n (%)  0-20%  20-40%  40-60%  60-80%  80-100% | 11 (20.8)  15 (28.3)  11 (20.8)  13 (24.5)  3 (5.7) | 4 (16.7)  9 (37.5)  5 (20.8)  6 (25.0)  0 (0) | 7 (24.1)  6 (20.7)  6 (20.7)  7 (24.1)  3 (10.3) | .4419 | 3 (42.9)  0 (0)  0 (0)  3 (42.9)  1 (14.3) | 8 (17.4)  15 (32.6)  11 (23.9)  10 (21.7)  2 (4.3) | .0413 |

*P* values <.05 indicate statistically significant associations.

†Data entry compliance was measured according to the number of complete entries in the eDiary and activity tracker recorded during the observation period. A completed entry was defined as having data reported for all the activity, bleeding and infusion variables in the eDiary on a given day, and any data recorded by the activity tracker on a given day.

‡*P* values were calculated using a Wilcoxon rank-sum test for continuous variables and chi-square or Fisher’s exact tests for categorical variables.

## TABLE S3 Bleeding episodes during the 6-month observation period

|  |  | Age group | | | Treatment regimen | | |
| --- | --- | --- | --- | --- | --- | --- | --- |
| **Outcome** | **Total**  **(N = 54)** | **<18 y**  **(n = 25)** | **≥18 y**  **(n = 29)** | ***P* value** | **On demand**  **(n = 7)** | **Prophylaxis**  **(n = 47)** | ***P* value** |
| Patients with zero bleeds, n (%) | 17 (31.5) | 7 (28.0) | 10 (34.5) | .609 | 1 (14.3) | 16 (34.0) | .4117 |
| All bleeds  Mean ± SD  Median (min-max) | 3.43 ± 5.06  1 (0-20.0) | 3.28 ± 4.45  1 (0-17.0) | 3.55 ± 5.61  1 (0-20.0) | .6959 | 6.14 ± 6.77  2 (0-17.0) | 3.02 ± 4.72  1 (0-20.0) | .2151 |
| Activity-related bleeds*  Mean ± SD | 1.39 ± 2.11 | 1.56 ± 2.27 | 1.24 ± 1.99 | .4358 | 2.29 ± 2.63 | 1.26 ± 2.03 | .3089 |
| Spontaneous bleeds*  Mean ± SD  Median (min-max) | 1.52 ± 2.94  0 (0-14.0) | 1.20 ± 2.08  0 (0-8.0) | 1.79 ± 3.54  0 (0-14.0) | .5237 | 3.57 ± 5.13  1 (0-14.0) | 1.21 ± 2.41  0 (0-13.0) | .1967 |

These are “reported as”.*P* values <.05 indicate statistically significant associations.

**TABLE S4**  Adverse events during the study in patients with hemophilia A treated with rFVIII (safety population, N = 60)

| **Adverse event** | **All patients**  **(N = 60)** | **Age group** | | | **Treatment regimen** | | |
| --- | --- | --- | --- | --- | --- | --- | --- |
| **<18 y**  **(n = 28)** | **≥18 y**  **(n = 32)** | ***P* value†** | **On demand**  **(n = 7)** | **Prophylaxis**  **(n = 53)** | ***P* value†** |
| Patients with events, n (%) | 7 (11.7) | 3 (10.7) | 4 (12.5) | 1 | 0 (0.0) | 7 (13.2) | .5839 |
| Adverse events, total, n‡ | 10 | 4 | 6 |  | 0 | 10 |  |
| Severity |  |  |  |  |  |  |  |
| Mild | 4 (40.0) | 2 (50.0) | 2 (33.3) |  | 0 (0.0) | 4 (40.0) |  |
| *Clostridium* test positive | 1 (10.0) | 1 (25.0) | 0 (0.0) |  | 0 (0.0) | 1 (10.0) |  |
| Cough | 1 (10.0) | 0 (0.0) | 1 (16.7) |  | 0 (0.0) | 1 (10.0) |  |
| Inguinal hernia | 1 (10.0) | 1 (25.0) | 0 (0.0) |  | 0 (0.0) | 1 (10.0) |  |
| Laceration | 1 (10.0) | 0 (0.0) | 1 (16.7) |  | 0 (0.0) | 1 (10.0) |  |
| Moderate | 4 (40.0) | 2 (50.0) | 2 (33.3) |  | 0 (0.0) | 4 (40.0) |  |
| Haemarthrosis | 1 (10.0) | 1 (25.0) | 0 (0.0) |  | 0 (0.0) | 1 (10.0) |  |
| Anal fistula | 1 (10.0) | 1 (25.0) | 0 (0.0) |  | 0 (0.0) | 1 (10.0) |  |
| Cardiac failure | 1 (10.0) | 0 (0.0) | 1 (16.7) |  | 0 (0.0) | 1 (10.0) |  |
| Acute kidney injury | 1 (10.0) | 0 (0.0) | 1 (16.7) |  | 0 (0.0) | 1 (10.0) |  |
| Severe | 2 (20.0) | 0 (0.0) | 2 (33.3) |  | 0 (0.0) | 2 (20.0) |  |
| Appendicitis | 1 (10.0) | 0 (0.0) | 1 (16.7) |  | 0 (0.0) | 1 (10.0) |  |
| Internal haemorrhage | 1 (10.0) | 0 (0.0) | 1 (16.7) |  | 0 (0.0) | 1 (10.0) |  |
| Not related to rFVIII | 10 (100.0) | 4 (100.0) | 6 (100.0) |  | 0 (0.0) | 10 (100.0) |  |
| Serious adverse event | 7 (70.0) | 3 (75.0) | 4 (66.7) |  | 0 (0.0) | 7 (70.0) |  |

Abbreviation: rFVIII, recombinant factor VIII.

†*P* values were calculated using chi-square or Fisher’s exact tests for categorical variables.

‡One patient could have multiple events
